# Supplementary material for: Oxide modified aluminum for removal of methyl orange and methyl blue in aqueous solution
Source: Royal Society of Chemistry journal article supplement (doi:10.1039/d0ra09048d), 2021-01-01
Supplement: d0ra09048d1.pdf [file d0ra09048d1.pdf]

## Supplementary

### **Oxide modified Al for removal of methyl orange and methyl blue in aqueous solution**

Song Xie<sup>a,b</sup>, Yang Yang<sup>a,b</sup>, Wei-Zhuo Gai<sup>c</sup>, Zhen-Yan Deng<sup>a,b,d,\*</sup>

<sup>a</sup>*Energy Materials & Physics Group, Department of Physics, Shanghai University, Shanghai 200444, China*

<sup>b</sup>*Institute of Low-Dimensional Carbon and Device Physics, Shanghai University, Shanghai 200444, China*

<sup>c</sup>*College of Physics and Electronic Information & Henan Key Laboratory of Electromagnetic Transformation and Detection, Luoyang Normal University, Luoyang 471934, China*

<sup>d</sup>*Shanghai Key Laboratory of High Temperature Superconductors, Shanghai University, 99 Shangda Road, Shanghai 200444, China*

\*Corresponding author: E-mail address: [zydeng@shu.edu.cn](mailto:zydeng@shu.edu.cn); Tel: +86-21-66134334.

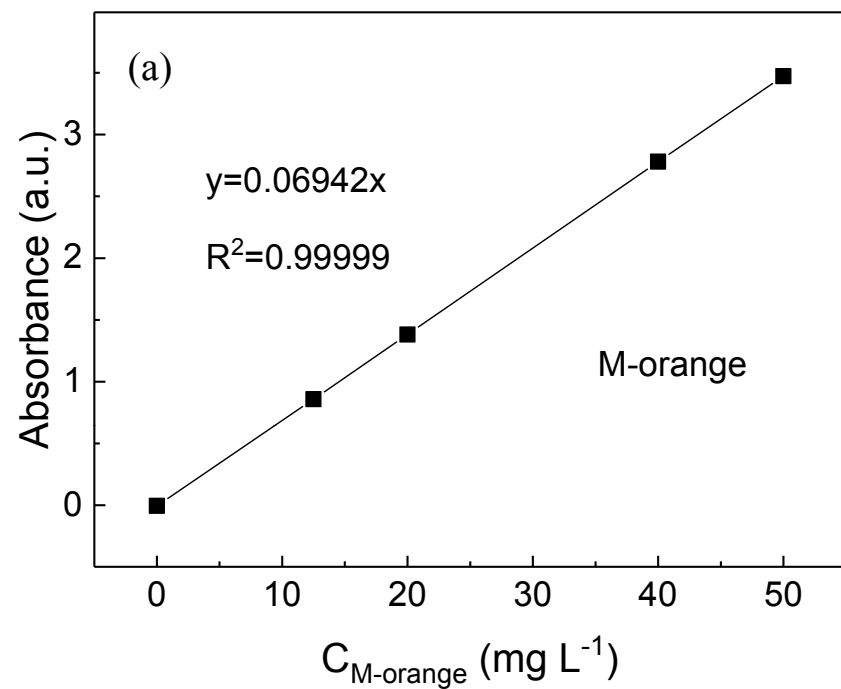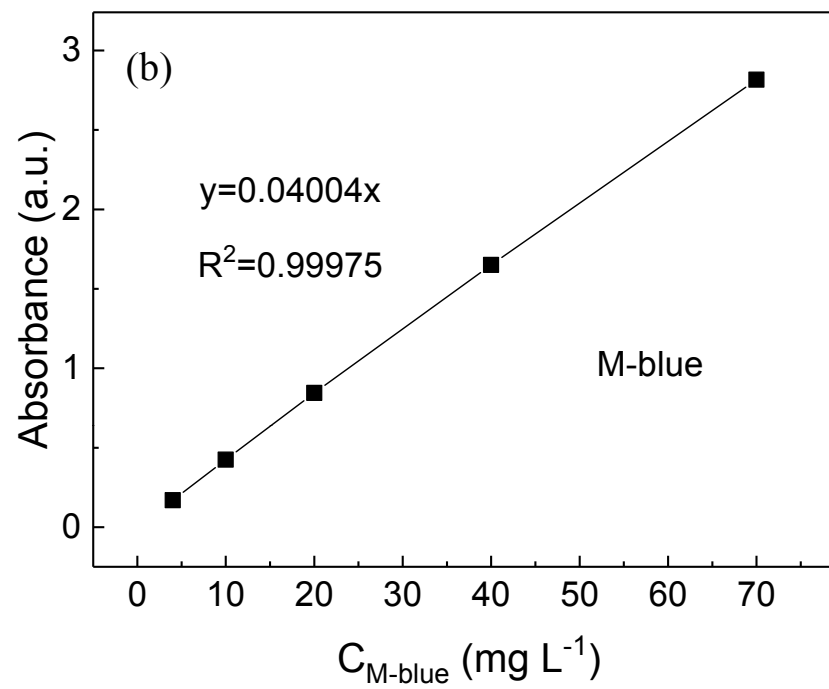

**Fig. S1** Linear fitting of the main absorption peak heights of (a) M-orange ( $\lambda_{\text{max}} \sim 464 \text{ nm}$ ) and (b) M-blue ( $\lambda_{\text{max}} \sim 314 \text{ nm}$ ) to their concentrations in aqueous solutions.

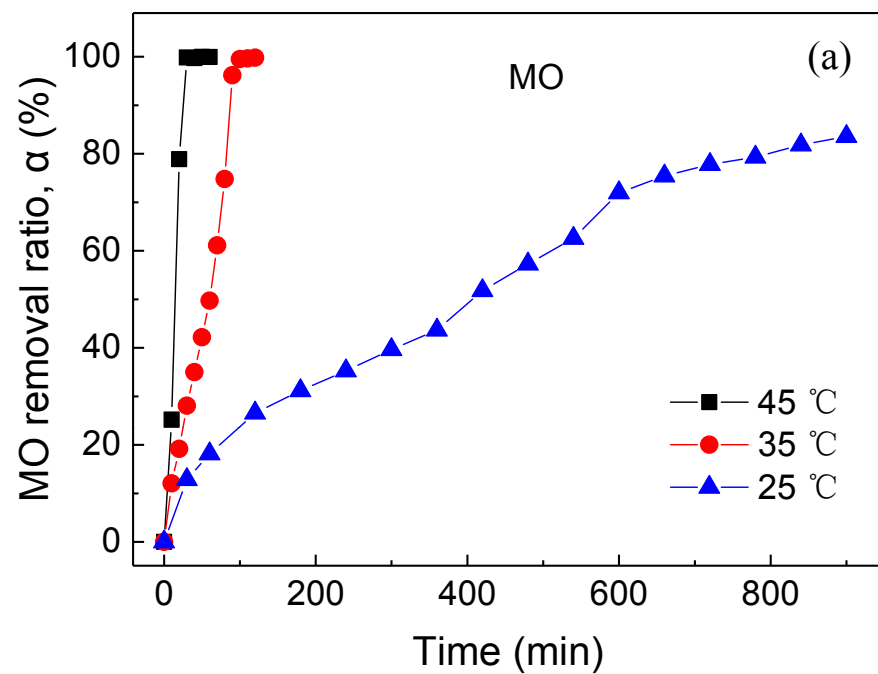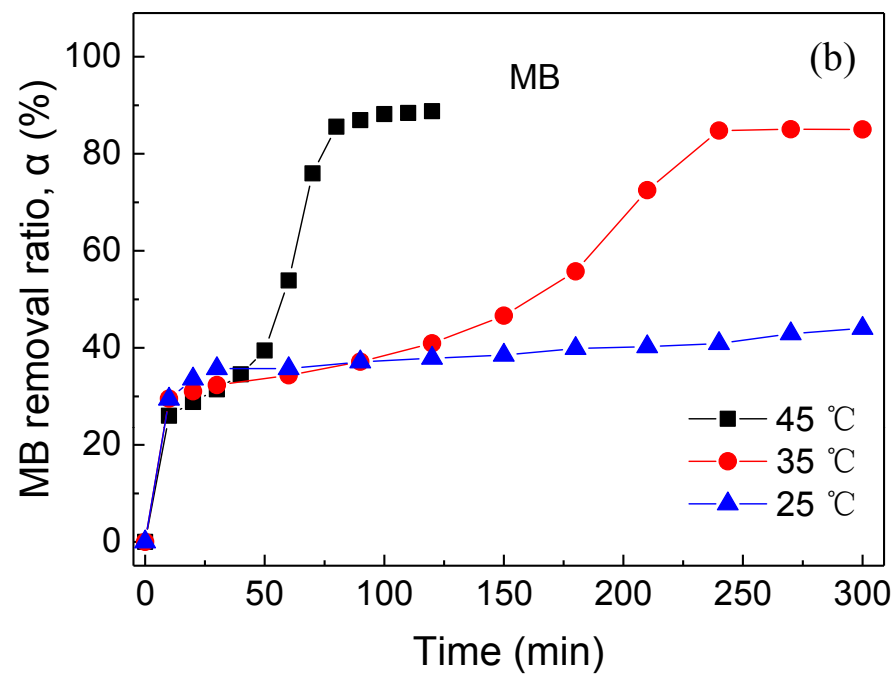

**Fig. S2** Dependence of (a) M-orange and (b) M-blue removal in aqueous solutions on reaction time at different temperature using 100 nm Al powder ( $C_{M\text{-orange}} = C_{M\text{-blue}} = 20 \text{ mg L}^{-1}$ , Al dosage =  $1 \text{ g L}^{-1}$ ).

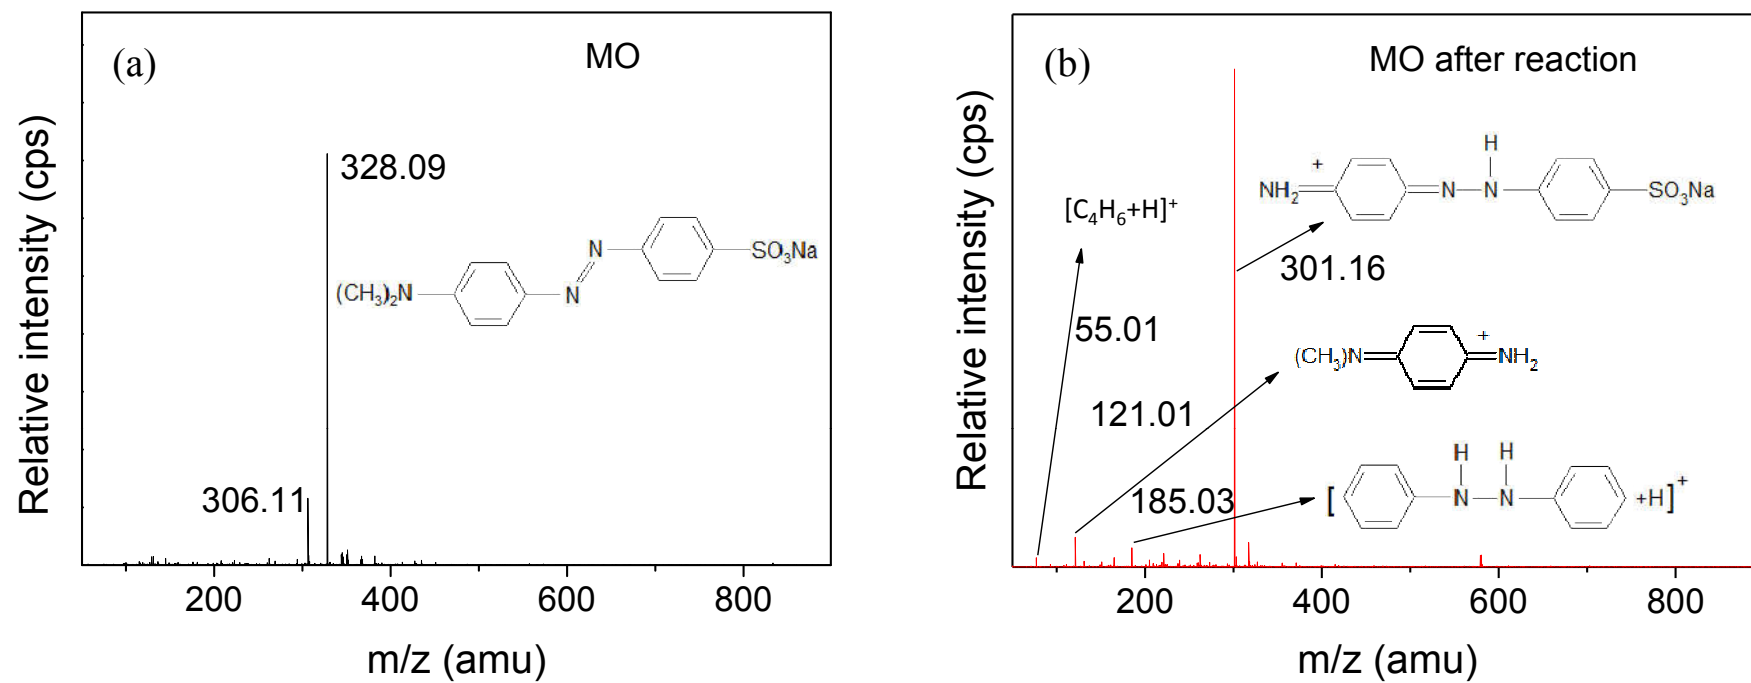

**Fig. S3** LC/MS spectra of M-orange solution in the positive ion mode (a) before and (b) after reaction using surface modified 7.29  $\mu\text{m}$  Al powder ( $C_{\text{M-orange}} = 20 \text{ mg L}^{-1}$ , Al dosage =  $1 \text{ g L}^{-1}$ ,  $T = 45 \text{ }^\circ\text{C}$ ).

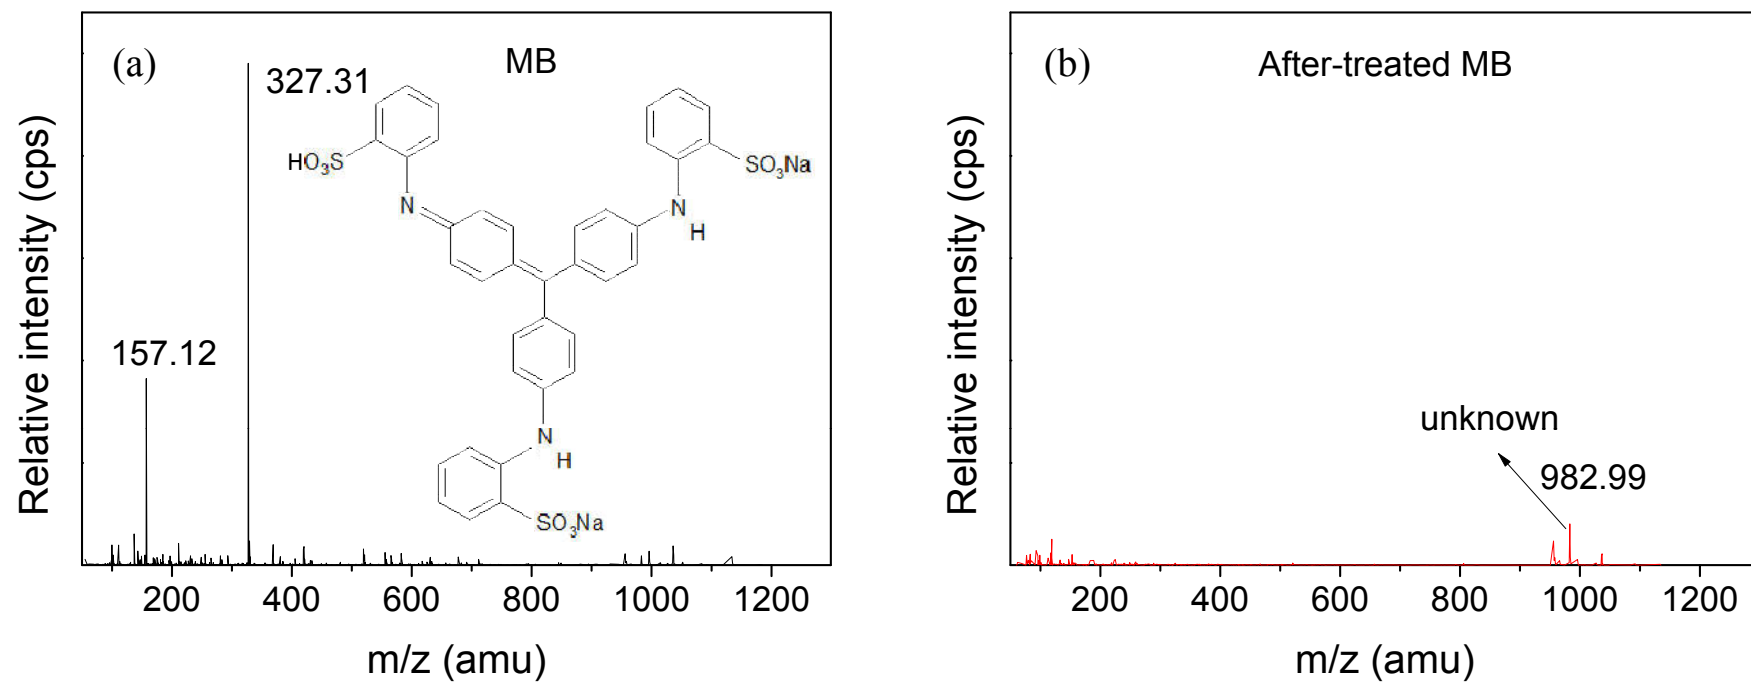

**Fig. S4** LC/MS spectra of M-blue solution in the negative ion mode (a) before and (b) after reaction using surface modified 7.29  $\mu\text{m}$  Al powder ( $C_{\text{M-blue}} = 20 \text{ mg L}^{-1}$ , Al dosage =  $1 \text{ g L}^{-1}$ ,  $T = 45 \text{ }^\circ\text{C}$ ).

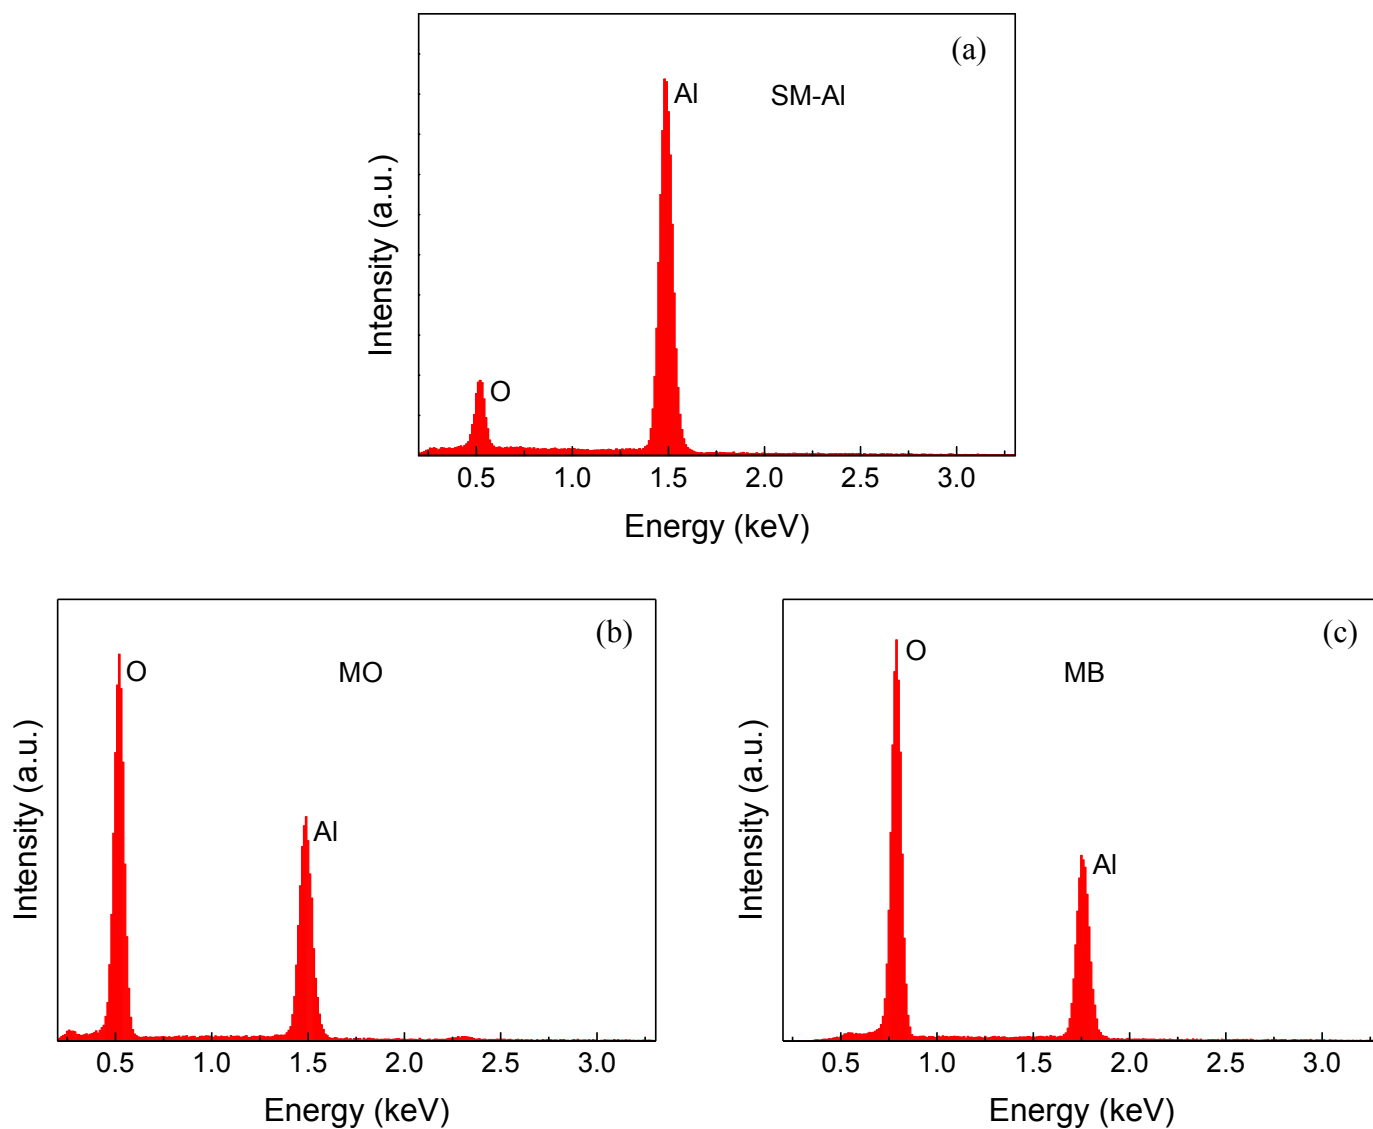

**Fig. S5.** EDS spectra of (a) surface modified 7.29  $\mu\text{m}$  Al powder, that in (a) after reaction with MO (b) or MB (c) in aqueous solutions ( $C_{\text{M-orange}} = C_{\text{M-blue}} = 20 \text{ mg L}^{-1}$ , Al dosage =  $1 \text{ g L}^{-1}$ ,  $T = 45 \text{ }^\circ\text{C}$ ).
